# Supplementary material
Source: publisher site journal article supplement (https://www.dovepress.com/article/118723)
Supplement: Supplementary file 1 [file get_supplementary_file.php]

## **Supplemental Document**

### **Effects of Resveratrol on P-glycoprotein and Cytochrome P450 3A *in vitro* and on Pharmacokinetics of Oral Saquinavir in Rats**

**Authors:** Jiapeng Li<sup>1,2</sup>, Yang Liu<sup>2</sup>, Jingru Zhang<sup>1,2</sup>, Xiaotong Yu<sup>1,2</sup>, Xiaoling Wang<sup>1</sup>, Libo Zhao<sup>1</sup>

#### **Affiliations:**

<sup>1</sup>Department of Pharmacy, Beijing Children's Hospital, Capital Medical University, 56 Nanlishi Road, Xicheng District, Beijing, 100045, China.

<sup>2</sup>Department of Pharmacy Administration and Clinical Pharmacy, School of Pharmaceutical Sciences, Peking University, 38 Xueyuan Road, Haidian District, Beijing, 100191, China.

#### **Figure Legends**

**Figure S1.** Composite curves graphed plasma saquinavir profiles after a single oral dose administration of saquinavir (30 mg/kg). Control group, n = 5, ID = 1~5.

**Figure S2.** Composite curves graphed plasma saquinavir profiles after a single oral dose administration of saquinavir (30 mg/kg) with oral co-administration of resveratrol (20 mg/kg). Treatment group, n = 5, ID = 6~10.

Figure S1

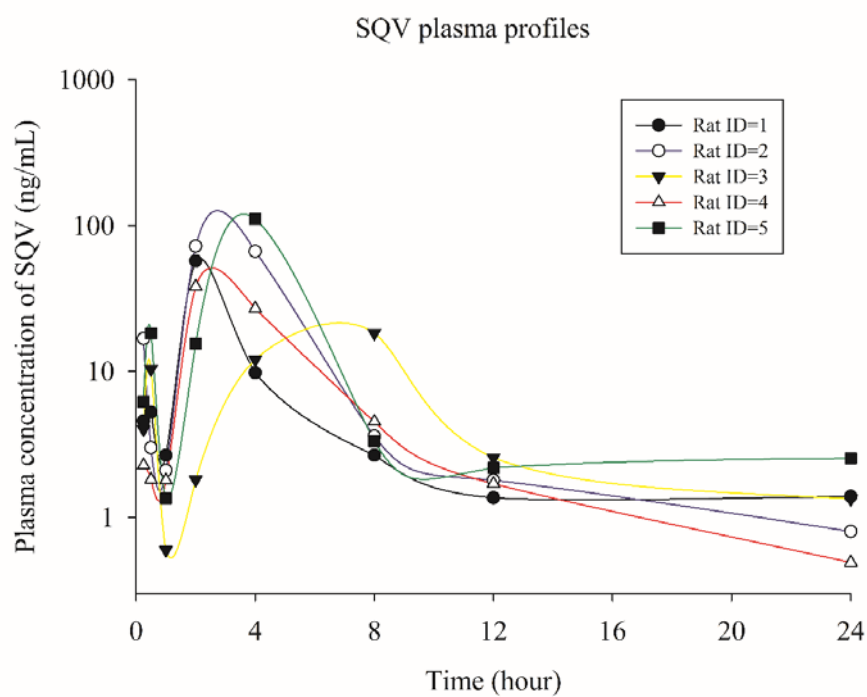

**Figure S1.** Composite curves graphed plasma saquinavir profiles after a single oral dose administration of saquinavir (30 mg/kg). Control group, n = 5, ID = 1~5.

Figure S2

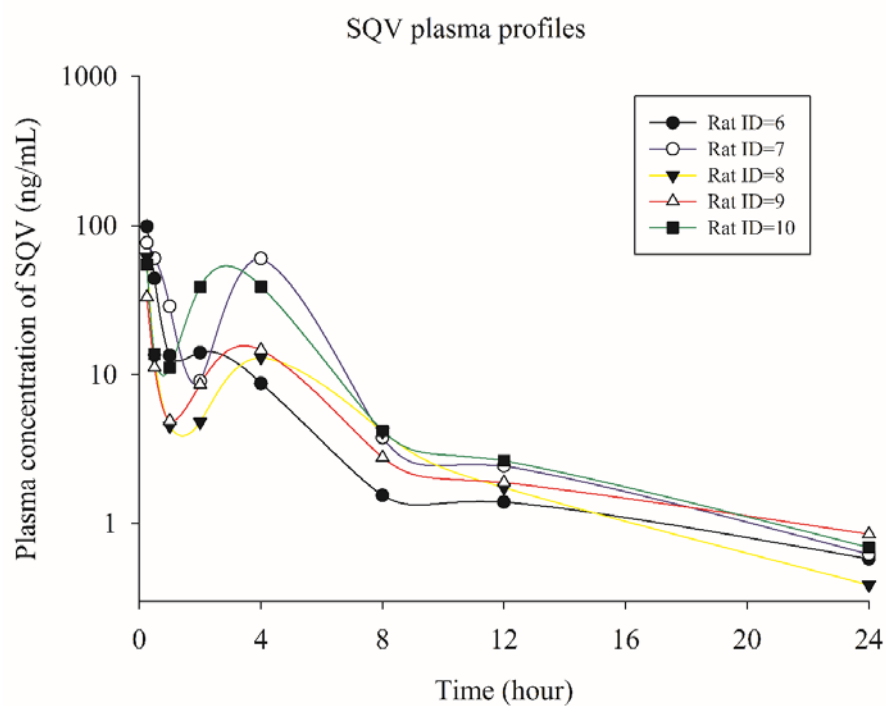

**Figure S2.** Composite curves graphed plasma saquinavir profiles after a single oral dose administration of saquinavir (30 mg/kg) with oral co-administration of resveratrol (20 mg/kg). Resveratrol treatment group, n = 5, ID = 6~10.
